# Supplementary material
Source: publisher site journal article supplement (https://www.dovepress.com/article/233129)
Supplement: Supplementary file 1 [file get_supplementary_file.php]

**Supplemental Table legends**

**Supplementary Table 1 Sequences of primers used for qPCR**

**Supplementary Table 2 The reverse primers and forward primers of miRNA**

**Supplementary Table 1 Sequences of primers used for qPCR**

| Gene name |  | 5’-3’Sequence | size |
| --- | --- | --- | --- |
| **DNMT1** | Forward | CCGACTACATCAAAGGCAGC | 193bp |
| Reverse | AGGTTGATGTCTGCGTGGTA |
| **DNMT3a-1** | Forward | TCTCCAAGTCCCCATCCATG | 193bp |
|  | Reverse | CAGCCATTTTCCACTGCTCT |  |
| **DNMT3b** | Forward | GGCCACCTTCAATAAGCTCG | 197bp |
|  | Reverse | GTTGCGTGTTGTTGGGTTTG |  |
| **MBD2** | Forward | TGGGAGAAGAGGCTACAAGG | 239bp |
|  | Reverse | AAAGCTTTGCAGAGGGGTTG |  |
| **GAPDH** | Forward | TCAAGAAGGTGGTGAAGCAGG | 115bp |
|  | Reverse | TCAAAGGTGGAGGAGTGGGT |  |
| **DNMT3a-2** | Forward | CCTGCGGTGATCTCCAAGT | 201bp |
|  | Reverse | GCCATTTTCCACTGCTCTTGA |  |

**Supplementary Table 2 The reverse primers and forward primers of miRNA**

| Gene name |  | 5’-3’Sequence |
| --- | --- | --- |
| **hsa-miR-296-5p** | Forward | TGCGCAGGGCCCCCCCTCAAT |
| stem loop | GTCGTATCCAGTGCAGGGTCCGAGGTATTCGCACTGGATACGACACAGGATT |
| **hsa-miR-134-5p** | Forward | TGCGCTGTGACTGGTTGACCAG |
| stem loop | GTCGTATCCAGTGCAGGGTCCGAGGTATTCGCACTGGATACGACCCCCTCTG |
| U6 | Forward | GCTTCGGCAGCACATATACTAAAAT |
| Reverse | CGCTTCACGAATTTGCGTGTCAT |
| stem loop | GAATTTGCGTGTCATCCTTG |

**Supplemental Figure legends**

**Supplemental Figure 1 A549 cells and NCI-H226 cells after 48 hours incubation with CDDP.**


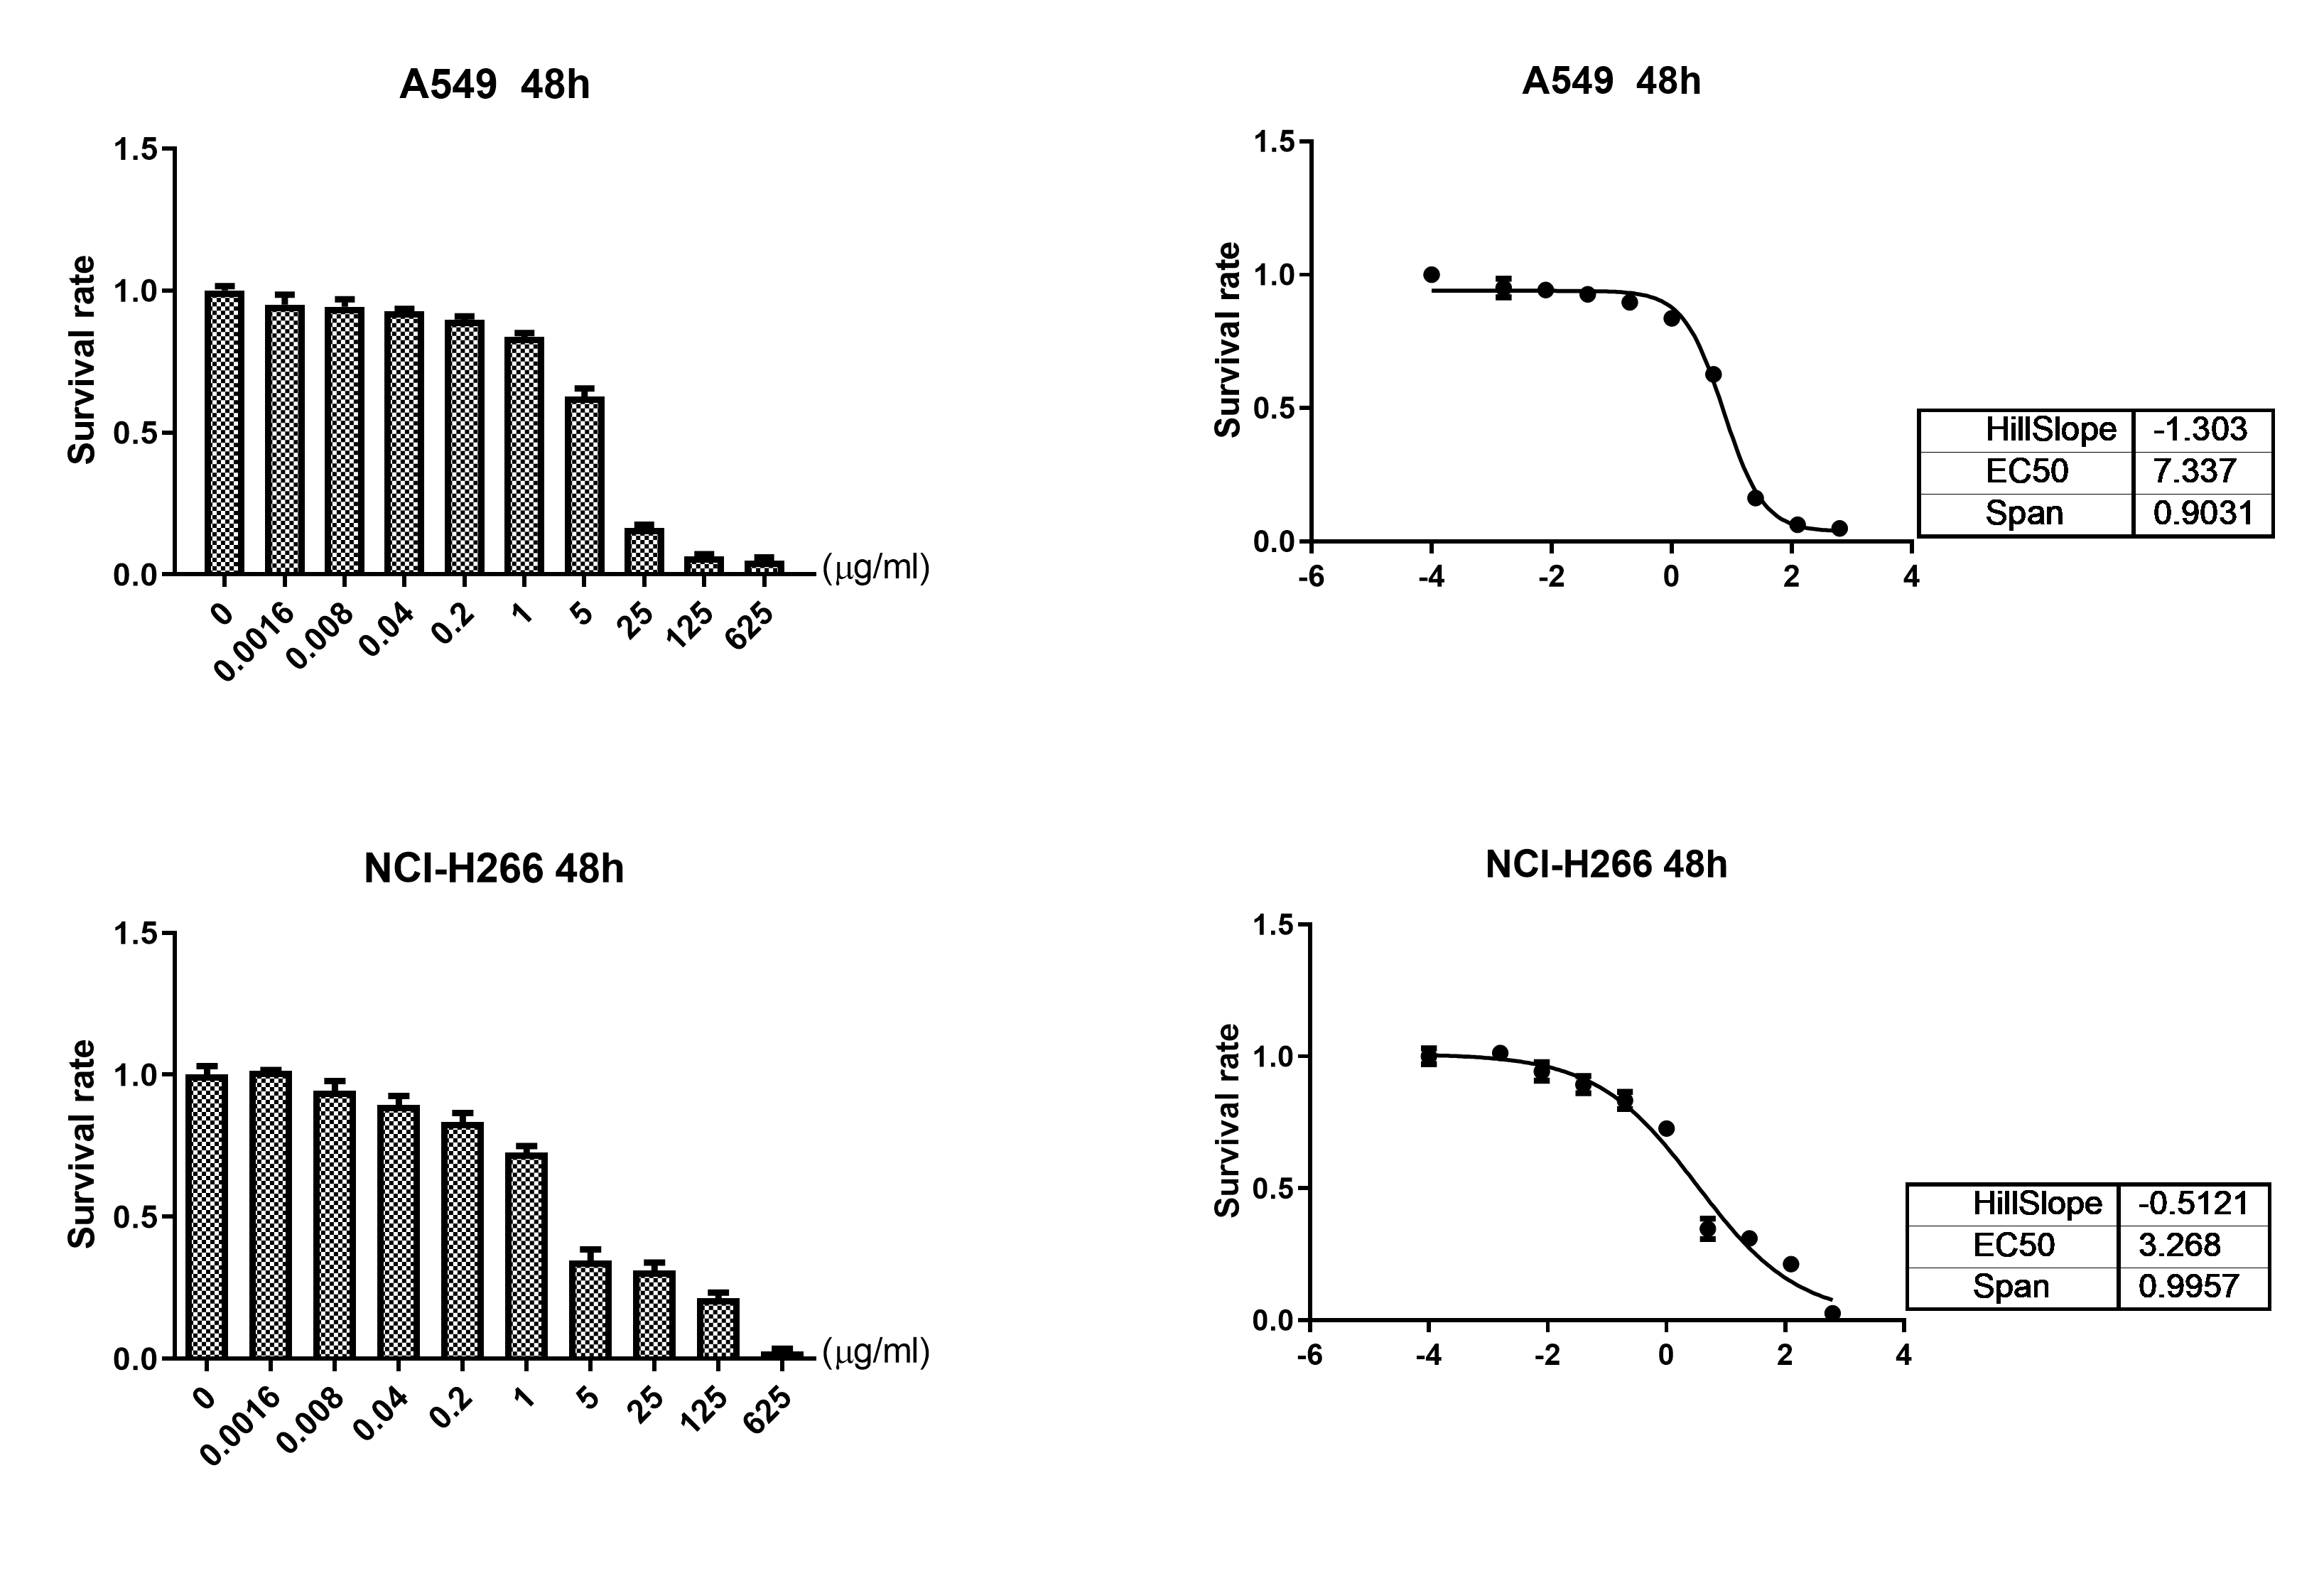


**Supplemental Figure legends**

**Supplemental Figure 1 A549 cells and NCI-H226 cells after 48 hours incubation with CDDP.**
